# Supplementary material for: Restructuring of Co3O4particles from polycrystalline microspheres to single-crystalline polyhedra under the assistance of acetic acid
Source: Royal Society of Chemistry journal article supplement (doi:10.1039/c4ce02359e), 2015-01-01
Supplement: c4ce02359e1.pdf [file c4ce02359e1.pdf]

## Supporting Information

### **Restructure of Co<sub>3</sub>O<sub>4</sub> particles from polycrystalline microspheres to single-crystalline polyhedra under the assistance of acetic acid**

*Hai Zhou<sup>†,‡</sup>, Baoliang Lv<sup>\*†</sup>, Liancheng Wang<sup>†</sup>, Dong Wu<sup>†</sup>, Yao Xu<sup>†</sup>*

<sup>†</sup>State Key Laboratory of Coal Conversion, Institute of Coal Chemistry, Chinese

Academy of Sciences, Taiyuan 030001, China

<sup>‡</sup>Department of Chemistry and Chemical Engineering, Zunyi Normal College, Zunyi

563002, China

\*Corresponding author. Tel: +86-0351-4049859; Fax: +86-0351-4041153;

E-mail: [lbl604@sxicc.ac.cn](mailto:lbl604@sxicc.ac.cn)

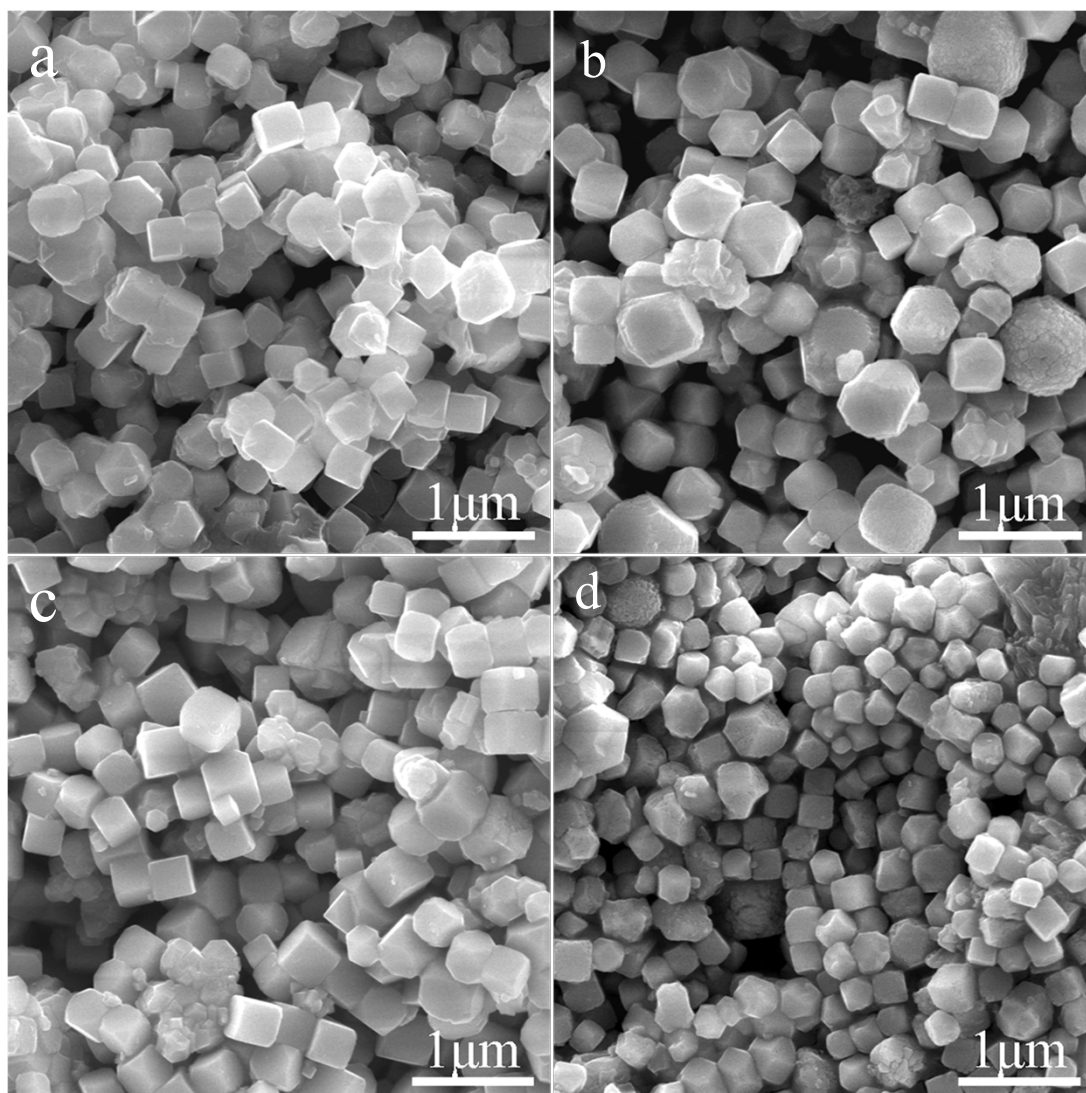

**Fig. S1.** SEM images of samples obtained at different concentration of  $\text{H}_2\text{SO}_4$  aqueous solution: (a) 1%, (b) 5%, (c) 10% and (d) 20%.

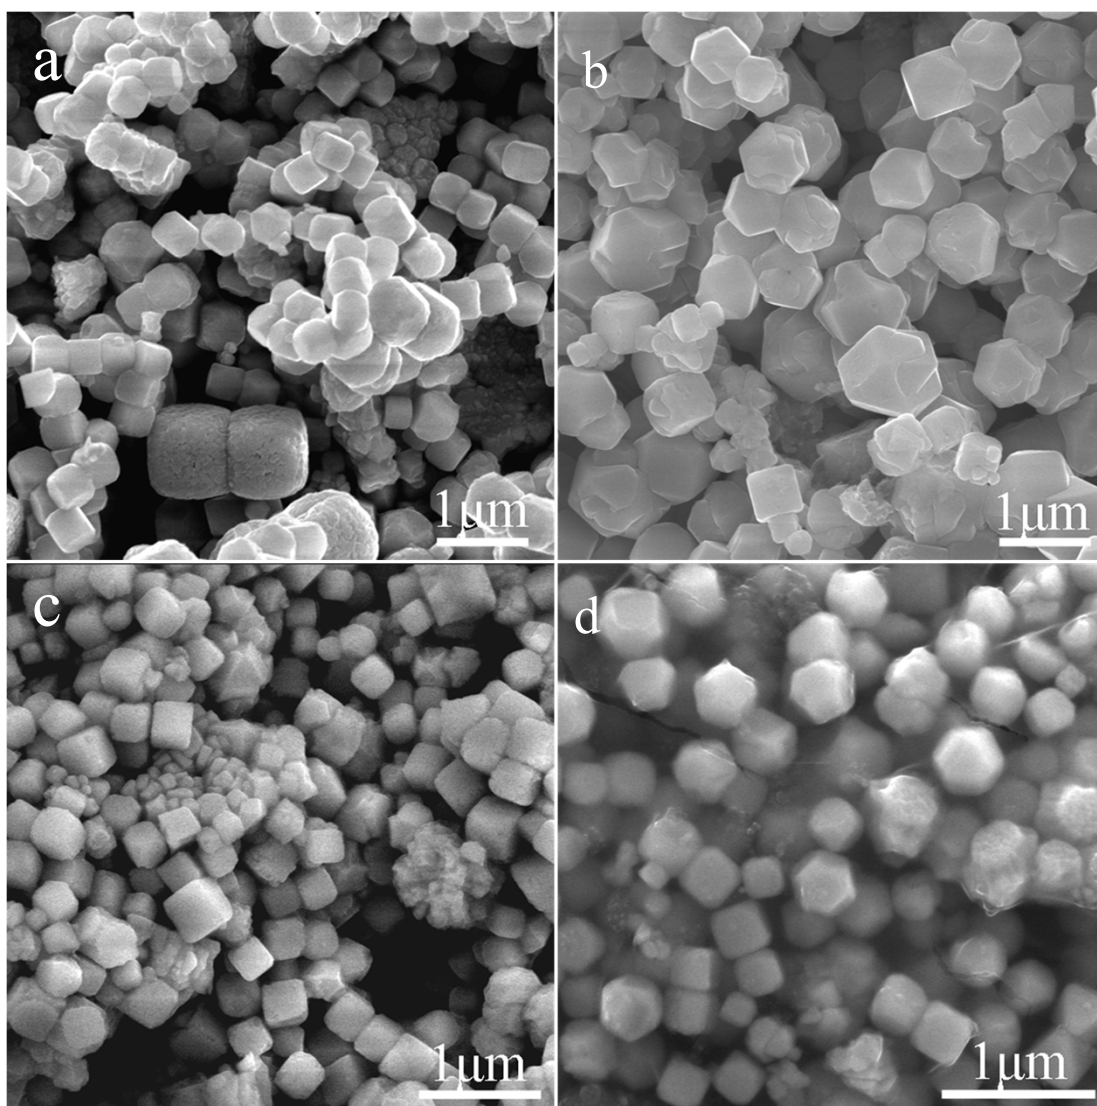

**Fig. S2.** SEM images of samples obtained at different concentration of citric acid aqueous solution:

(a) 1%, (b) 5%, (c) 10% and (d) 20%.

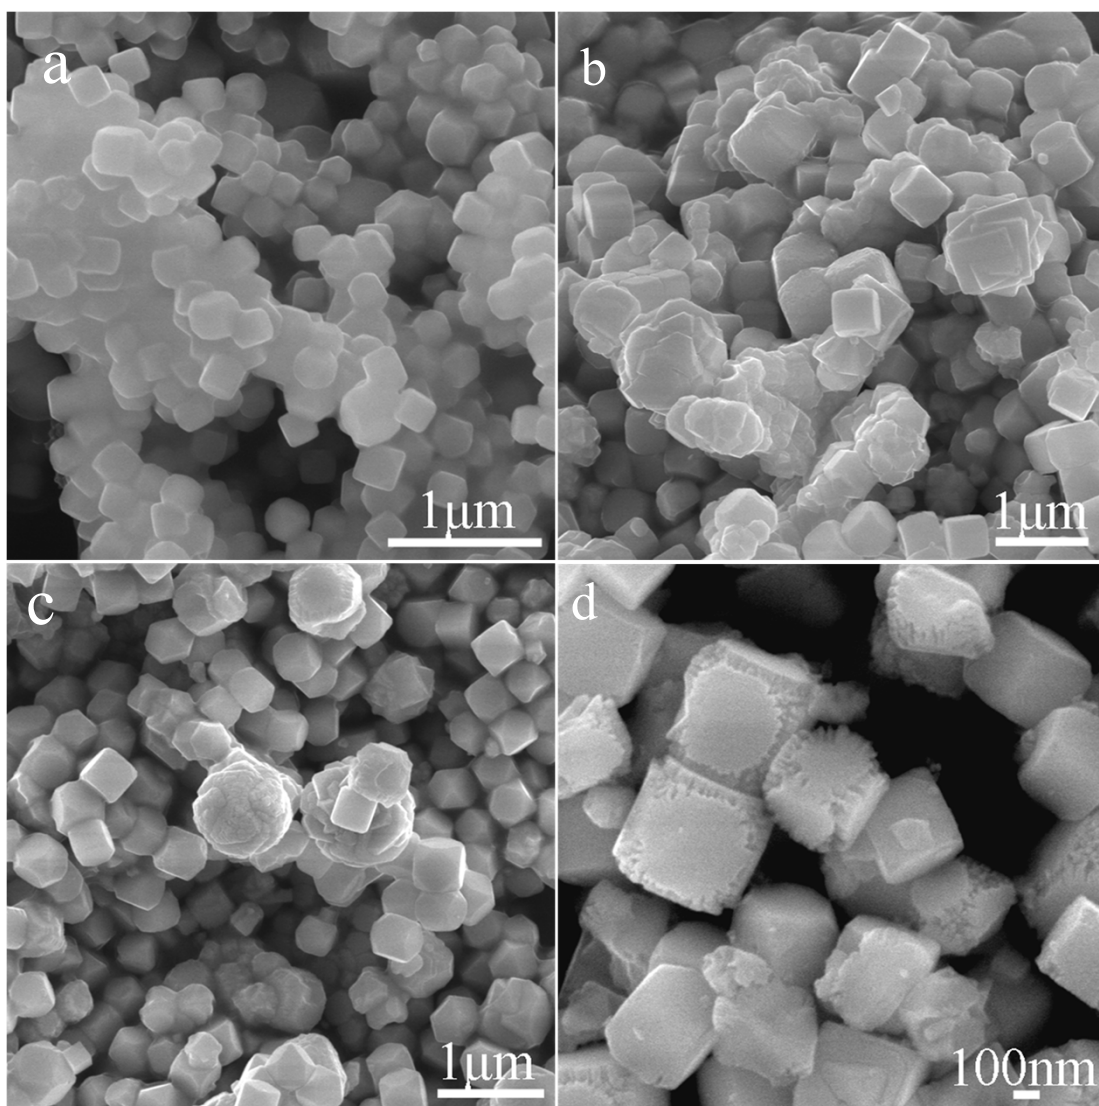

**Fig. S3.** SEM images of samples obtained at different treating temperatures with 5%  $\text{H}_2\text{SO}_4$  aqueous solution: (a) 10 °C, (b) 30 °C, (c) 60 °C and (d) 90 °C.

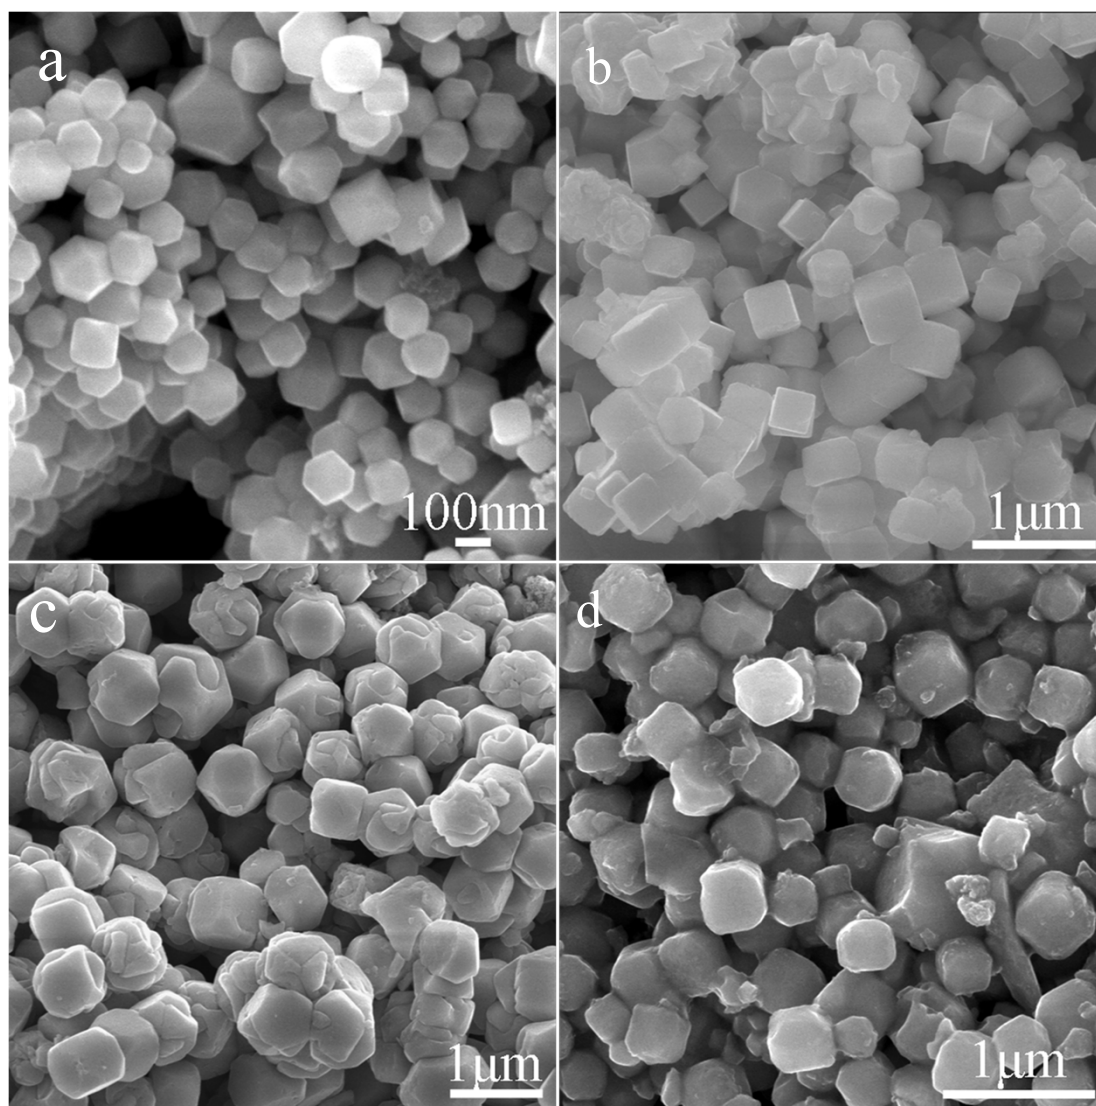

**Fig. S4.** SEM images of samples obtained at different treating temperatures with 5% citric acid aqueous solution: (a) 10 °C, (b) 30 °C, (c) 60 °C and (d) 90 °C.

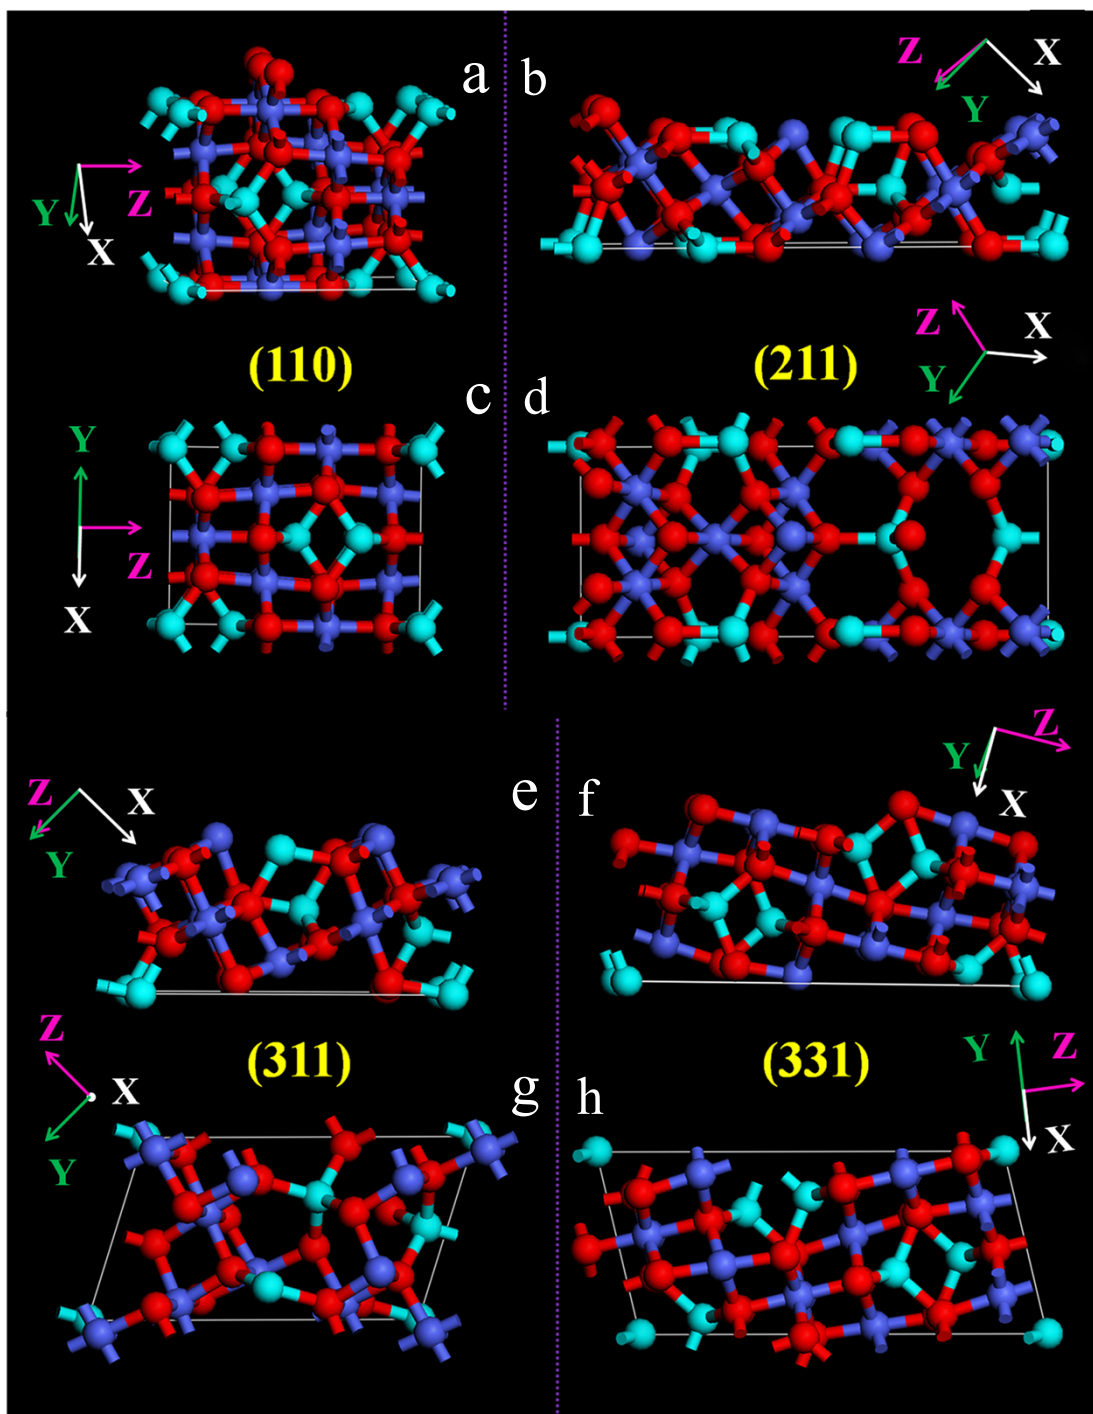

**Fig. S5.** Crystal structures of (110), (211), (311) and (331) facets of  $\text{Co}_3\text{O}_4$ . (a), (b), (e) and (f) are side view images; (c), (d), (g) and (h) are top view images of (110), (211), (311) and (331) facets, respectively. The red, blue and cyan balls represent O,  $\text{Co}^{3+}$ , and  $\text{Co}^{2+}$ , respectively. The X, Y, and Z directions show scheme of the crystal structure, and the white point in (g) represent that the X direction perpendicular to the paper.
